# Supplementary material for: Requirements for data integration platforms in biomedical research networks: a reference model
Source: PeerJ journal article supplement (doi:10.7717/peerj.755), 2015-02-05
Supplement: SI1_Table_Reference_model.pdf [file SI1_Table_Reference_model.pdf]

## Reference goals

| Feature     | Explanation                                                                                                                             |
|-------------|-----------------------------------------------------------------------------------------------------------------------------------------|
| Number      | RG1                                                                                                                                     |
| Name        | Conduct research project                                                                                                                |
| Description | The top-level goal of a research network is to conduct its intended research project. Often, this goal is provided by a funding agency. |
| Weighting   | high                                                                                                                                    |

| Feature     | Explanation                                                                                                                                                                                                   |
|-------------|---------------------------------------------------------------------------------------------------------------------------------------------------------------------------------------------------------------|
| Number      | RG2                                                                                                                                                                                                           |
| Name        | Answer research questions                                                                                                                                                                                     |
| Description | A research network has research questions that are either explicitly or implicitly stated. They guide the direction of the network's research. One goal of the research network is to answer these questions. |
| Weighting   | high                                                                                                                                                                                                          |

| Feature     | Explanation                                                                                                                                                                                                     |
|-------------|-----------------------------------------------------------------------------------------------------------------------------------------------------------------------------------------------------------------|
| Number      | RG3                                                                                                                                                                                                             |
| Name        | Create, store, and retrieve data                                                                                                                                                                                |
| Description | During the course of a research network's work, data are created. Analysis of these data contributes to the answers of research questions. These data are stored and provided for retrieval by project members. |
| Weighting   | high                                                                                                                                                                                                            |

| Feature     | Explanation                                                                                                                                                                                                                      |
|-------------|----------------------------------------------------------------------------------------------------------------------------------------------------------------------------------------------------------------------------------|
| Number      | RG4                                                                                                                                                                                                                              |
| Name        | Analyze data                                                                                                                                                                                                                     |
| Description | Raw data contributed to a research network are per se without meaning. They have to be analyzed and transformed into knowledge first to contribute to answering research questions and thus supporting the goals of the network. |
| Weighting   | high                                                                                                                                                                                                                             |

| Feature     | Explanation                                                                                                                                                                                                                   |
|-------------|-------------------------------------------------------------------------------------------------------------------------------------------------------------------------------------------------------------------------------|
| Number      | RG5                                                                                                                                                                                                                           |
| Name        | Control data access and usage                                                                                                                                                                                                 |
| Description | Data of the research network require adequate protection. On the one hand, personal data like patient data are affected. On the other hand, unpublished data can be considered as the intellectual property of their creator. |
| Weighting   | medium                                                                                                                                                                                                                        |

## Reference requirements

| Feature     | Explanation                                                                                                                                                      |
|-------------|------------------------------------------------------------------------------------------------------------------------------------------------------------------|
| Number      | RR1                                                                                                                                                              |
| Name        | Create data                                                                                                                                                      |
| Description | The IT system has to provide the capability to create new data or incorporate newly created data. This is necessary as a first step when creating new knowledge. |
| Weighting   | high                                                                                                                                                             |

| Feature     | Explanation                                                                                                                                    |
|-------------|------------------------------------------------------------------------------------------------------------------------------------------------|
| Number      | RR2                                                                                                                                            |
| Name        | Retrieve external data                                                                                                                         |
| Description | External data sources must be made available to the research network. Such data sources are for example databases available over the Internet. |
| Weighting   | medium                                                                                                                                         |

| Feature     | Explanation                                                                                                                                                                                                     |
|-------------|-----------------------------------------------------------------------------------------------------------------------------------------------------------------------------------------------------------------|
| Number      | RR3                                                                                                                                                                                                             |
| Name        | Represent data                                                                                                                                                                                                  |
| Description | Data of internal or external sources available through the IT system have to be transferred into a suitable representation. This representation has to be precisely defined and locating data must be possible. |
| Weighting   | high                                                                                                                                                                                                            |

| Feature     | Explanation                                                                                                                                               |
|-------------|-----------------------------------------------------------------------------------------------------------------------------------------------------------|
| Number      | RR4                                                                                                                                                       |
| Name        | Define syntax                                                                                                                                             |
| Description | The data format must be syntactically defined in a comprehensive way. This is necessary for correct retrieval and analysis of the network's data sources. |
| Weighting   | high                                                                                                                                                      |

| Feature     | Explanation                                                                                                       |
|-------------|-------------------------------------------------------------------------------------------------------------------|
| Number      | RR5                                                                                                               |
| Name        | Define data model                                                                                                 |
| Description | Both a logical and a physical data model are required for efficient internal administration of the research data. |
| Weighting   | high                                                                                                              |

| <b>Feature</b>     | <b>Explanation</b>                                                                                                                                                                                       |
|--------------------|----------------------------------------------------------------------------------------------------------------------------------------------------------------------------------------------------------|
| <b>Number</b>      | RR6                                                                                                                                                                                                      |
| <b>Name</b>        | Identify data                                                                                                                                                                                            |
| <b>Description</b> | Data sources must be identified unambiguously throughout the research network. Identity and location of the data source must be announced for the network, for example by means of a metadata directory. |
| <b>Weighting</b>   | low                                                                                                                                                                                                      |

| <b>Feature</b>     | <b>Explanation</b>                                                                                                                                          |
|--------------------|-------------------------------------------------------------------------------------------------------------------------------------------------------------|
| <b>Number</b>      | RR7                                                                                                                                                         |
| <b>Name</b>        | Define semantics                                                                                                                                            |
| <b>Description</b> | Semantics of the data provided by the network's data sources must be precisely defined. As a consequence, data integration on a semantic layer is possible. |
| <b>Weighting</b>   | medium                                                                                                                                                      |

| <b>Feature</b>     | <b>Explanation</b>                                                                                                                                                                        |
|--------------------|-------------------------------------------------------------------------------------------------------------------------------------------------------------------------------------------|
| <b>Number</b>      | RR8                                                                                                                                                                                       |
| <b>Name</b>        | Administrate intellectual property                                                                                                                                                        |
| <b>Description</b> | Access to data of the research network must be regulated in terms of intellectual property. This is an important prerequisite for the broad acceptance of such data integration platform. |
| <b>Weighting</b>   | medium                                                                                                                                                                                    |

| <b>Feature</b>     | <b>Explanation</b>                                                                                                                                                                                                       |
|--------------------|--------------------------------------------------------------------------------------------------------------------------------------------------------------------------------------------------------------------------|
| <b>Number</b>      | RR9                                                                                                                                                                                                                      |
| <b>Name</b>        | Protect data                                                                                                                                                                                                             |
| <b>Description</b> | Data must be protected against unauthorized access. This is especially important, if personal data like patient data are affected. The conformance with corresponding legal aspects is also covered by this requirement. |
| <b>Weighting</b>   | high                                                                                                                                                                                                                     |

| <b>Feature</b>     | <b>Explanation</b>                                                                                                                                                                                                                   |
|--------------------|--------------------------------------------------------------------------------------------------------------------------------------------------------------------------------------------------------------------------------------|
| <b>Number</b>      | RR10                                                                                                                                                                                                                                 |
| <b>Name</b>        | Show results                                                                                                                                                                                                                         |
| <b>Description</b> | For best possible support of researchers data and results of analysis have to be prepared and visualized adequately. The choice of the visualization technique depends on the users' requirements as well as the nature of the data. |
| <b>Weighting</b>   | high                                                                                                                                                                                                                                 |

| <b>Feature</b>     | <b>Explanation</b>                                                                                                                                                                                  |
|--------------------|-----------------------------------------------------------------------------------------------------------------------------------------------------------------------------------------------------|
| <b>Number</b>      | RR11                                                                                                                                                                                                |
| <b>Name</b>        | Integrate data                                                                                                                                                                                      |
| <b>Description</b> | For analyses of data contributed by more than one project of the research network it is necessary to integrate the data first. For a specific analysis, the adequately represented data are merged. |
| <b>Weighting</b>   | medium                                                                                                                                                                                              |

| <b>Feature</b>     | <b>Explanation</b>                                                                                                                                                                                           |
|--------------------|--------------------------------------------------------------------------------------------------------------------------------------------------------------------------------------------------------------|
| <b>Number</b>      | RR12                                                                                                                                                                                                         |
| <b>Name</b>        | Define analytical methods                                                                                                                                                                                    |
| <b>Description</b> | For working on research questions, data have to be analyzed with a method that suits the intended purpose. Methods must be chosen from already available approaches or have to be developed for the project. |
| <b>Weighting</b>   | medium                                                                                                                                                                                                       |

| <b>Feature</b>     | <b>Explanation</b>                                                                                                                                                                 |
|--------------------|------------------------------------------------------------------------------------------------------------------------------------------------------------------------------------|
| <b>Number</b>      | RR13                                                                                                                                                                               |
| <b>Name</b>        | Define analytical process                                                                                                                                                          |
| <b>Description</b> | The process of data analysis is comprised of one or more data sources and one or more analytical methods. These components can be chained and connected to fulfill research tasks. |
| <b>Weighting</b>   | high                                                                                                                                                                               |

| <b>Feature</b>     | <b>Explanation</b>                                                                                                                                                                                                   |
|--------------------|----------------------------------------------------------------------------------------------------------------------------------------------------------------------------------------------------------------------|
| <b>Number</b>      | RR14                                                                                                                                                                                                                 |
| <b>Name</b>        | Static Workflow                                                                                                                                                                                                      |
| <b>Description</b> | The system provides predefined workflows for analysis. Users are guided since they can only change parameters within the workflow. The system has to ensure, that only sensible parameter combinations are possible. |
| <b>Weighting</b>   | medium                                                                                                                                                                                                               |

| <b>Feature</b>     | <b>Explanation</b>                                                                                                                                        |
|--------------------|-----------------------------------------------------------------------------------------------------------------------------------------------------------|
| <b>Number</b>      | RR15                                                                                                                                                      |
| <b>Name</b>        | Dynamic Workflow                                                                                                                                          |
| <b>Description</b> | Users of the IT system have to be able to define analytical pipelines on their own. They are not limited by the system in terms of defining the workflow. |
| <b>Weighting</b>   | medium                                                                                                                                                    |
